# Supplementary material for: Mutational profile of rare variants in inflammasome-related genes in Behçet disease: A Next Generation Sequencing approach
Source: PubMed Central journal article supplement (PMC5559572; doi:10.1038/s41598-017-09164-7), 2017-08-16
Supplement: 41598_2017_9164_MOESM1_ESM.pdf [file 41598_2017_9164_MOESM1_ESM.pdf]

## **Mutational profile of rare variants in inflammasome-related genes in Behçet disease. A Next Generation Sequencing approach**

PhD Sergio Burillo-Sanz<sup>1</sup>, PhD Marco-Antonio Montes-Cano<sup>1</sup>, PhD José-Raúl García-Lozano<sup>1</sup>, PhD Lourdes Ortiz-Fernández<sup>1</sup>, Norberto Ortego-Centeno<sup>2</sup>, Francisco-José García-Hernández<sup>3</sup>, Gerard Espinosa<sup>4</sup>, Genaro Graña-Gil<sup>5</sup>, Juan Sánchez-Bursón<sup>6</sup>, María Rosa Juliá<sup>7</sup>, Roser Solans<sup>8</sup>, Ricardo Blanco<sup>9</sup>, Ana-Celia Barnosi-Marín<sup>10</sup>, Ricardo Gómez de la Torre<sup>11</sup>, Patricia Fanlo<sup>12</sup>, Mónica Rodríguez-Carballeira<sup>13</sup>, Luis Rodríguez-Rodríguez<sup>14</sup>, Teresa Camps<sup>15</sup>, Santos Castañeda<sup>16</sup>, Juan-Jose Alegre-Sancho<sup>17</sup>, PhD Javier Martín<sup>18</sup>, PhD María Francisca González-Escribano<sup>1\*</sup>.

<sup>1</sup>Department of Immunology, Hospital Universitario Virgen del Rocío (IBiS, CSIC, US), Sevilla 41013, Spain. <sup>2</sup>Department of Internal Medicine, Hospital Clínico San Cecilio, Granada 18003, Spain. <sup>3</sup>Department of Internal Medicine, Hospital Universitario Virgen del Rocío, Sevilla 41003, Spain. <sup>4</sup>Department Autoimmune Diseases, Hospital Universitari Clínic, Barcelona 08036, Spain. <sup>5</sup>Department of Rheumatology, Complejo Hospitalario Universitario A Coruña, A Coruña 15006, Spain

<sup>6</sup>Department of Rheumatology, Hospital Universitario de Valme, Sevilla 41014, Spain

<sup>7</sup>Department of Immunology, Hospital Universitari Son Espases, Palma de Mallorca 07120, Spain. <sup>8</sup>Department of Internal Medicine, Autoimmune Systemic Diseases Unit, Hospital Vall d'Hebron, Universidad Autonoma de Barcelona, Barcelona 08035, Spain.

<sup>9</sup>Department of Rheumatology, Hospital Universitario Marqués de Valdecilla, Santander 39008, Spain. <sup>10</sup>Department of Internal Medicine, Complejo Hospitalario

Torrecárdenas, Almería 04009, Spain. <sup>11</sup>Department of Internal Medicine, Hospital Universitario Central de Asturias, Asturias 33011, Spain. <sup>12</sup>Department of Internal Medicine, Hospital Virgen del Camino, Pamplona 31008, Spain. <sup>13</sup>Department of Internal Medicine, Hospital Universitari Mútua Terrassa, Terrassa 08221, Spain. <sup>14</sup>Department of Rheumatology, Hospital Clínico San Carlos, Madrid 28040, Spain. <sup>15</sup>Department of Internal Medicine, Hospital Regional Universitario de Málaga, Málaga 29010, Spain. <sup>16</sup> Department of Rheumatology, Hospital de la Princesa, IIS-Princesa, Madrid 28006, Spain. <sup>17</sup>Department of Rheumatology, Hospital Universitario Doctor Peset, Valencia 46017, Spain. <sup>18</sup>Instituto de Parasitología y Biomedicina “López-Neyra”, CSIC, PTS Granada, Granada 18016, Spain.

Corresponding autor: María Francisca González-Escribano, Servicio de Inmunología. HU Virgen del Rocío. 41013 Sevilla. Spain. mariaf.gonzalez.sspa@juntadeandalucia.es. Tel +34955013228 Fax +34955013221.

**Table S1.** Variants in Inflammasome-related genes identified in Behçet disease patients in the present study.

| Mutations          | SNP id.          | Alleles nbr. N=710 | Alleles (MAF) 1KG ALL pops. N=5008 | Alleles (MAF) 1KG IBS pop. N=214 | Reported pathology            | PolyPhen2 functional prediction | SIFT functional prediction |
|--------------------|------------------|--------------------|------------------------------------|----------------------------------|-------------------------------|---------------------------------|----------------------------|
| CECR1_Arg49Trp     | rs199614299 (**) | 2                  | 0 (0)                              | 0 (0)                            | Unknown                       | Benign                          | Damaging                   |
| CECR1_Ala247Val    | rs750868279 (**) | 1                  | 0 (0)                              | 0 (0)                            | Unknown                       | Damaging                        | Tolerated                  |
| CECR1_Met309Ile    | rs146597836      | 3                  | 3 (0.0006)                         | 1 (0.005)                        | Unknown                       | Benign                          | Tolerated                  |
| CECR1_His335Arg    | rs2231495        | 218                | 1826 (0.3646)                      | 58 (0.271)                       | Non-functional Polym          | Benign                          | Tolerated                  |
| CECR1_Val349Ile    | rs74317375       | 3                  | 4 (0.0008)                         | 0 (0)                            | Unknown                       | Benign                          | Tolerated                  |
| CECR1_Thr360Ala    | rs775440641 (**) | 2                  | 0 (0)                              | 0 (0)                            | Sneddon's syndrome            | Damaging                        | Damaging                   |
| MEFV_Ala89Thr      | rs104895124 (**) | 1                  | 0 (0)                              | 0 (0)                            | FMF                           | Damaging                        | Damaging                   |
| MEFV_Leu110Pro     | rs11466018       | 1                  | 59 (0.0118)                        | 0 (0)                            | FMF                           | Benign                          | Damaging                   |
| MEFV_Gly111Glu     | rs751454741 (**) | 1                  | 0 (0)                              | 0 (0)                            | Unknown                       | Benign                          | Tolerated                  |
| MEFV_Glu148Gln     | rs3743930        | 5                  | 633 (0.1264)                       | 0 (0)                            | FMF, Functional Polym         | Damaging                        | Damaging                   |
| MEFV_Arg202Gln     | rs224222         | 156                | 681 (0.136)                        | 63 (0.294)                       | Non-functional Polym          | Benign                          | Tolerated                  |
| MEFV_Leu367Val     | NA               | 1                  | 0 (0)                              | 0 (0)                            | Unknown                       | Benign                          | Tolerated                  |
| MEFV_Pro369Ser     | rs11466023       | 3                  | 101 (0.0202)                       | 1 (0.005)                        | FMF                           | Damaging                        | Damaging                   |
| MEFV_His404Arg     | rs755659290 (**) | 1                  | 0 (0)                              | 0 (0)                            | Unknown                       | Damaging                        | Damaging                   |
| MEFV_Arg408Gln     | rs11466024       | 3                  | 86 (0.0172)                        | 1 (0.005)                        | FMF                           | Benign                          | Tolerated                  |
| MEFV_Met582Leu     | rs104895165 (**) | 1                  | 0 (0)                              | 0 (0)                            | Recurrent Arthritis, FMF      | Benign                          | Tolerated                  |
| MEFV_Ile591Thr     | rs11466045       | 5                  | 22 (0.0044)                        | 2 (0.009)                        | FMF                           | Benign                          | Tolerated                  |
| MEFV_Met694Val     | rs61752717       | 2                  | 1 (0.0002)                         | 0 (0)                            | FMF                           | Benign                          | Tolerated                  |
| MEFV_Lys695Arg     | rs104895094      | 1                  | 9 (0.0018)                         | 1 (0.005)                        | FMF                           | Damaging                        | Tolerated                  |
| MEFV_Val726Ala     | rs28940579 (**)  | 1                  | 0 (0)                              | 0 (0.000)                        | FMF                           | Benign                          | Tolerated                  |
| MEFV_Ala744Ser     | rs61732874       | 5                  | 9 (0.0018)                         | 4 (0.019)                        | FMF                           | Benign                          | Tolerated                  |
| MEFV_Arg761His     | rs104895097 (**) | 1                  | 0 (0)                              | 0 (0)                            | FMF                           | Benign                          | Tolerated                  |
| MVK_Val5Ala        | rs141765653      | 1                  | 1 (0.0002)                         | 0 (0)                            | HIDS                          | Benign                          | Tolerated                  |
| MVK_Ser52Asn       | rs7957619        | 79                 | 380 (0.0759)                       | 33 (0.154)                       | Non-functional Polym          | Benign                          | Tolerated                  |
| MVK_Val80Ile       | rs76914224       | 1                  | 10 (0.002)                         | 0 (0)                            | HIDS                          | Benign                          | Tolerated                  |
| MVK_Thr237Ser      | rs104895366 (**) | 1                  | 0 (0)                              | 0 (0)                            | HIDS                          | Damaging                        | Tolerated                  |
| MVK_Val293Met      | rs104895356      | 1                  | 1 (0.0002)                         | 0 (0)                            | HIDS                          | Damaging                        | Tolerated                  |
| MVK_Val377Ile      | rs28934897 (**)  | 1                  | 0 (0)                              | 0 (0)                            | HIDS                          | Benign                          | Tolerated                  |
| NLRP3_Val198Met    | rs121908147      | 5                  | 20 (0.004)                         | 1 (0.005)                        | FCAS                          | Benign                          | Tolerated                  |
| NLRP3_Ile315Val    | rs180177501 (**) | 1                  | 0 (0)                              | 0 (0)                            | MAGIC Syndrome                | Benign                          | Tolerated                  |
| NLRP3_Arg488Lys    | rs145268073      | 2                  | 1 (0.0002)                         | 0 (0)                            | FCAS                          | Benign                          | Tolerated                  |
| NLRP3_Gln703Lys    | rs35829419       | 39                 | 112 (0.0224)                       | 16 (0.075)                       | FCAS, Functional Polym        | Benign                          | Tolerated                  |
| NLRP3_Ser726Gly    | rs147946775      | 1                  | 1 (0.0002)                         | 0 (0)                            | CINCA/NOMID                   | Damaging                        | Tolerated                  |
| NOD2_Leu81Val      | rs34936594 (**)  | 1                  | 0 (0)                              | 0 (0)                            | Unknown                       | Benign                          | Damaging                   |
| NOD2_Ala140Thr     | rs34684955       | 1                  | 35 (0.007)                         | 0 (0)                            | CD                            | Benign                          | Tolerated                  |
| NOD2_Leu248Arg     | rs104895423      | 1                  | 1 (0.0002)                         | 0 (0)                            | CD                            | Damaging                        | Damaging                   |
| NOD2_Pro268Ser     | rs2066842        | 61                 | 511 (0.102)                        | 61 (0.285)                       | Non-functional Polym          | Benign                          | Tolerated                  |
| NOD2_Asn289Ser     | rs5743271        | 13                 | 20 (0.004)                         | 2 (0.009)                        | CD                            | Benign                          | Tolerated                  |
| NOD2_Arg311Trp     | rs104895427      | 2                  | 4 (0.0008)                         | 0 (0)                            | CD                            | Damaging                        | Damaging                   |
| NOD2_Leu349Phe     | NA               | 2                  | 0 (0)                              | 0 (0)                            | Unknown                       | Benign                          | Damaging                   |
| NOD2_Arg702Trp     | rs2066844        | 22                 | 72 (0.0144)                        | 12 (0.056)                       | CD                            | Damaging                        | Damaging                   |
| NOD2_Arg703Cys     | rs5743277        | 2                  | 5 (0.001)                          | 0 (0)                            | CD                            | Damaging                        | Damaging                   |
| NOD2_Val733Leu     | NA               | 1                  | 0 (0)                              | 0 (0)                            | Unknown                       | Benign                          | Tolerated                  |
| NOD2_Ala755Val     | rs61747625       | 2                  | 1 (0.0002)                         | 0 (0)                            | CD                            | Damaging                        | Tolerated                  |
| NOD2_Arg791Gln     | rs104895464      | 2                  | 1 (0.0002)                         | 0 (0)                            | Spondylarthropathy            | Benign                          | Tolerated                  |
| NOD2_Val793Met     | rs104895444      | 3                  | 1 (0.0002)                         | 0 (0)                            | CD                            | Benign                          | Tolerated                  |
| NOD2_Val816Ile     | NA               | 1                  | 0 (0)                              | 0 (0)                            | Unknown                       | Benign                          | Tolerated                  |
| NOD2_Met863Val     | rs104895447      | 1                  | 1 (0.0002)                         | 0 (0)                            | CD                            | Benign                          | Tolerated                  |
| NOD2_Gly908Arg     | rs2066845        | 7                  | 23 (0.0046)                        | 2 (0.009)                        | CD                            | Damaging                        | Damaging                   |
| NOD2_Ala918Asp     | rs104895452      | 1                  | 3 (0.0006)                         | 1 (0.005)                        | CD                            | Damaging                        | Tolerated                  |
| NOD2_Val955Ile     | rs5743291        | 62                 | 167 (0.0333)                       | 28 (0.131)                       | CD, Functional Polym          | Benign                          | Tolerated                  |
| PSTPIP1_Thr68Met   | rs201872851      | 2                  | 13 (0.0026)                        | 0 (0)                            | Unknown                       | Damaging                        | Tolerated                  |
| PSTPIP1_Val122Ile  | NA               | 1                  | 0 (0)                              | 0 (0)                            | Unknown                       | Benign                          | Tolerated                  |
| PSTPIP1_Glu277Asp  | NA               | 1                  | 0 (0)                              | 0 (0)                            | PAPASH                        | Benign                          | Tolerated                  |
| PSTPIP1_Asp289His  | NA               | 2                  | 0 (0)                              | 0 (0)                            | Unknown                       | Damaging                        | Tolerated                  |
| PSTPIP1_Arg405Cys  | rs201253322      | 2                  | 4 (0.0008)                         | 1 (0.005)                        | Idiopathic juvenile arthritis | Benign                          | Tolerated                  |
| TNFRSF1A_Pro75Leu  | rs4149637        | 3                  | 141 (0.0282)                       | 0 (0)                            | TRAPS                         | Damaging                        | Tolerated                  |
| TNFRSF1A_Arg121Gln | rs4149584        | 8                  | 30 (0.006)                         | 0 (0)                            | TRAPS                         | Benign                          | Tolerated                  |
| TNFRSF1A_His155Tyr | NA               | 1                  | 0 (0)                              | 0 (0)                            | Unknown                       | Benign                          | Tolerated                  |
| TNFRSF1A_Ile199Thr | rs104895247 (**) | 2                  | 0 (0)                              | 0 (0)                            | Unknown                       | Benign                          | Tolerated                  |
| TNFRSF1A_Arg312Lys | rs200900510      | 1                  | 6 (0.0012)                         | 0 (0)                            | Unknown                       | Benign                          | Tolerated                  |
| TNFRSF1A_Asn336His | NA               | 4                  | 0 (0)                              | 0 (0)                            | Unknown                       | Benign                          | Damaging                   |

Polym: Polymorphism. NA: not available or SNP undescribed. Unknown: Unavailable information in clinical data bases. 1KG: 1000 genomes, (\*\*): SNP not found in 1000 Genomes Project Phase 3 but found in Exome Aggregation Consortium (ExAC) database.

**Table S2.** Frequency of 3 *NOD2* loss of function variants in Spanish BD patients and controls

| <i>NOD2</i>                 | p.Asn289Ser |           | p.Arg702Trp |           | p.Gly908Arg |          |
|-----------------------------|-------------|-----------|-------------|-----------|-------------|----------|
|                             | BD          | Controls  | BD          | Controls  | BD          | Controls |
| <b>Mutated alleles</b>      | 13 (0.018)  | 2 (0.009) | 22 (0.03)   | 12 (0.06) | 7 (0.01)    | 2 (0.01) |
| <b>Total tested alleles</b> | 710         | 214       | 710         | 214       | 710         | 214      |
| <b>P-values</b>             | 0.36        |           | 0.09        |           | 0.95        |          |

Controls and their genotypes from 1000 genomes IBS population.

**Table S3.** Clinical features of BD patients carrying rare variants.

| Gene            | Nr. Patients | Clinical features    |                           |                            |                  |                      |                |
|-----------------|--------------|----------------------|---------------------------|----------------------------|------------------|----------------------|----------------|
|                 |              | Genital sores (60%)* | Vascular affection (21%)* | Digestive affection (16%)* | Arthritis (42%)* | SNC affection (18%)* | Uveitis (54%)* |
| <b>CECR1</b>    | 11           | 67%                  | 0%                        | 33%                        | 33%              | 33%                  | 0%             |
| <b>MEFV</b>     | 32           | 89%                  | 11%                       | 22%                        | 44%              | 22%                  | 78%            |
| <b>MVK</b>      | 5            | 0%                   | 0%                        | 80%                        | 80%              | 0%                   | 0%             |
| <b>NLRP3</b>    | 9            | 67%                  | 33%                       | 33%                        | 67%              | 0%                   | 33%            |
| <b>NOD2</b>     | 40           | 43%                  | 0%                        | 14%                        | 43%              | 0%                   | 29%            |
| <b>PSTPI1</b>   | 8            | 50%                  | 0%                        | 17%                        | 67%              | 17%                  | 50%            |
| <b>TNFRSF1A</b> | 19           | 67%                  | 33%                       | 33%                        | 33%              | 33%                  | 67%            |

For each gene, percentage of patients with rare variants having each clinical manifestation is displayed.

\*Percentage of patients with this clinical feature in the BD cohort.

No significant differences were found in any case ( $P < 0.05$ ).

**A**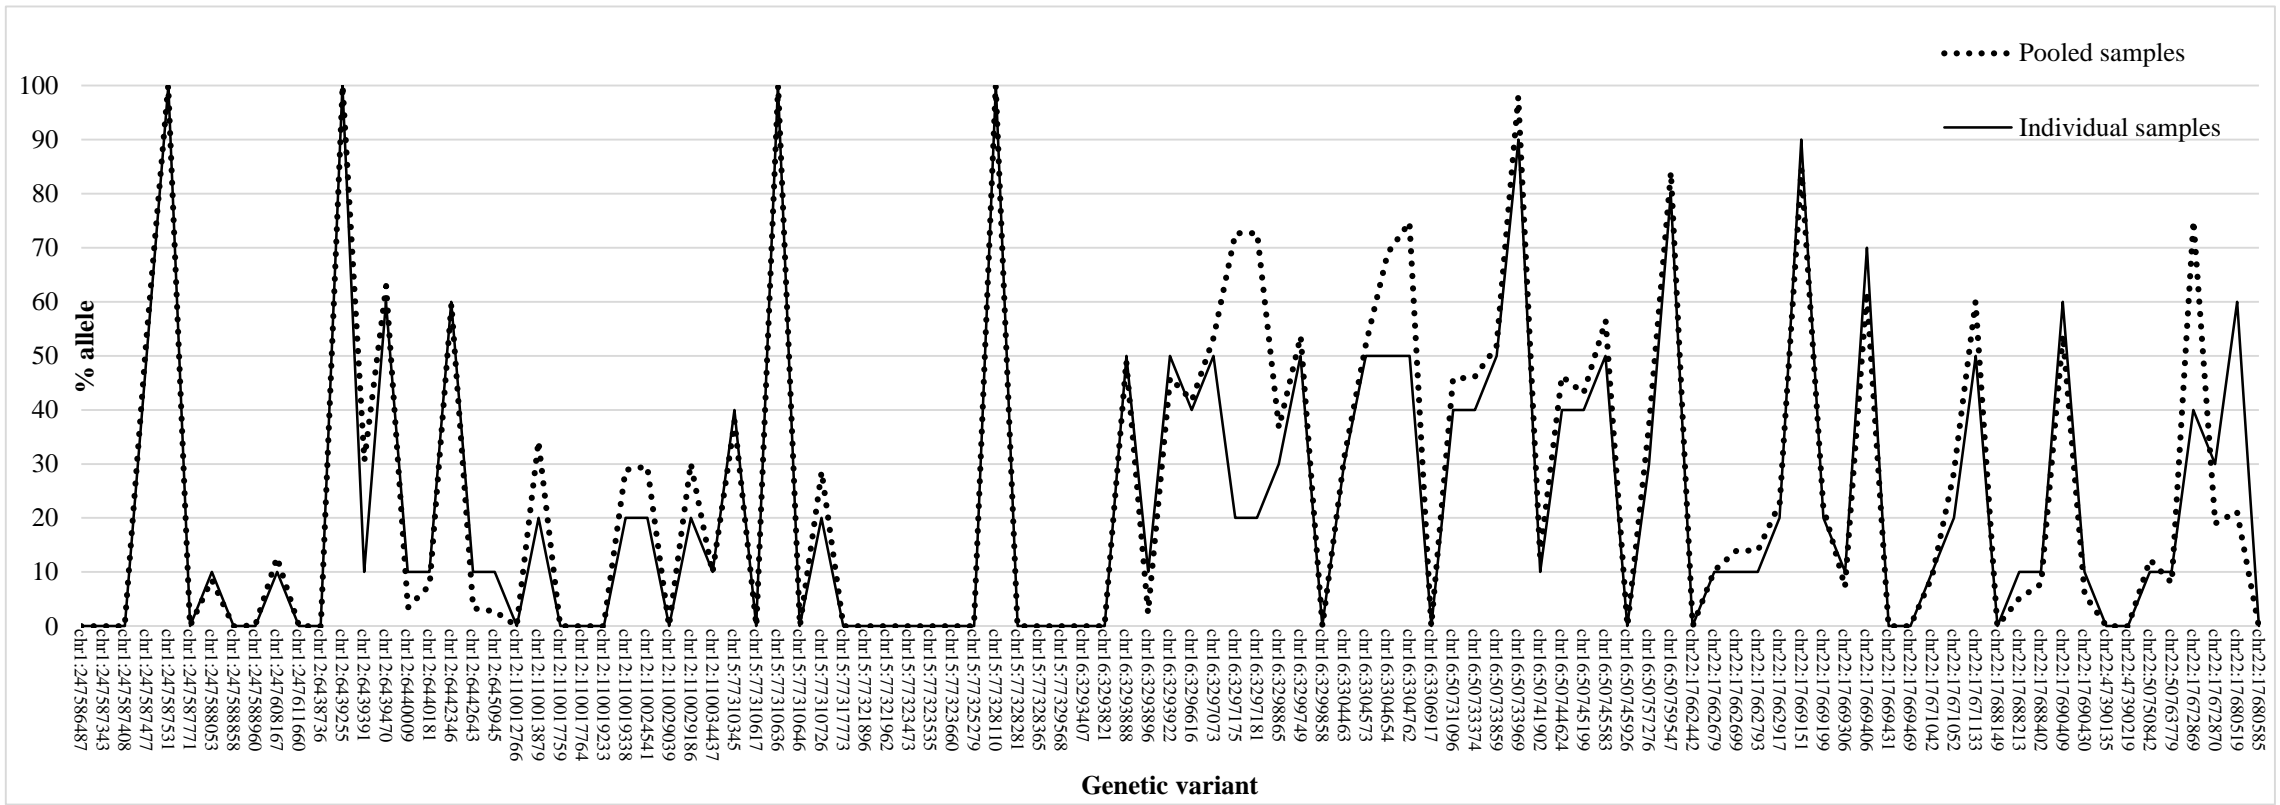**B**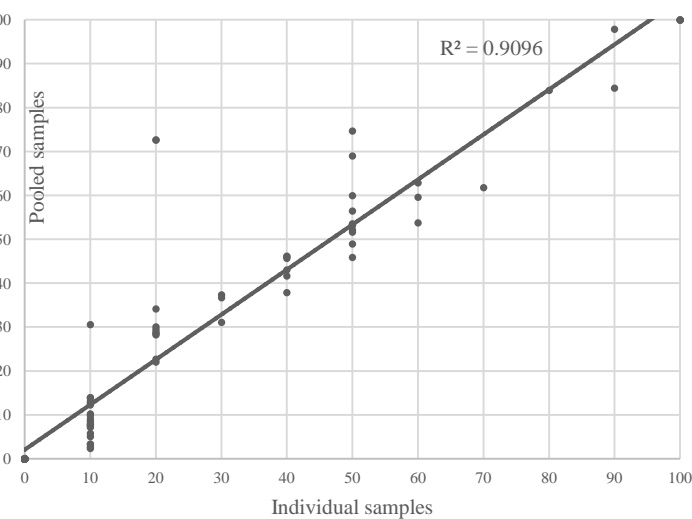

**Figure S1.** Validation of the method used to quantify alleles in the pooled samples. **A.** Representation of the percentage of each allele in 101 polymorphic positions (listed in the x axis) sequenced in 5 samples, in both ways, individually (continuous line) and pooled (dotted line). **B.** Coefficient of linear correlation ( $R^2$ ) for the percentage of the alleles quantification in the same quality control.

**A** Classification of variants according to their 1000 genomes MAF

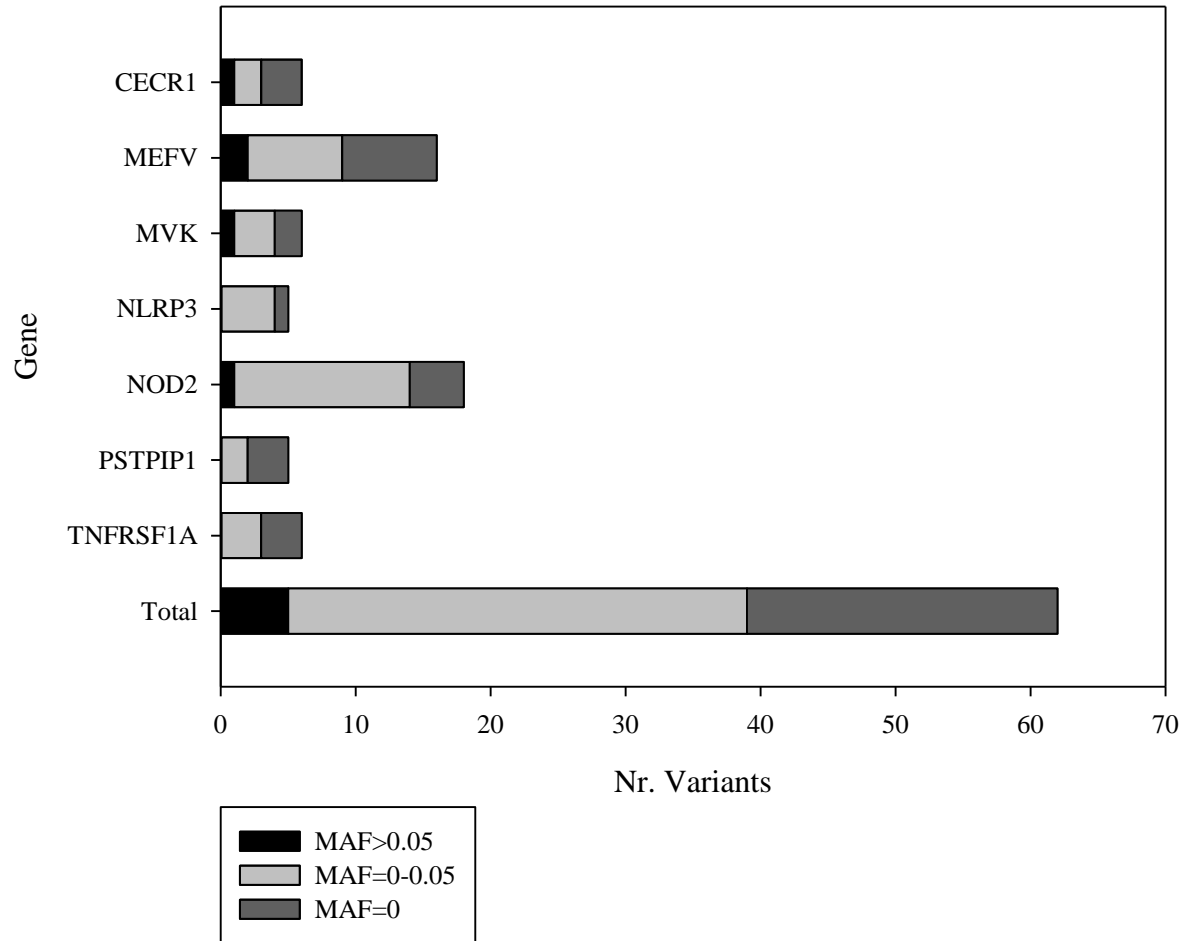

**B** Classification of variants according Clinical Human Mutations Database

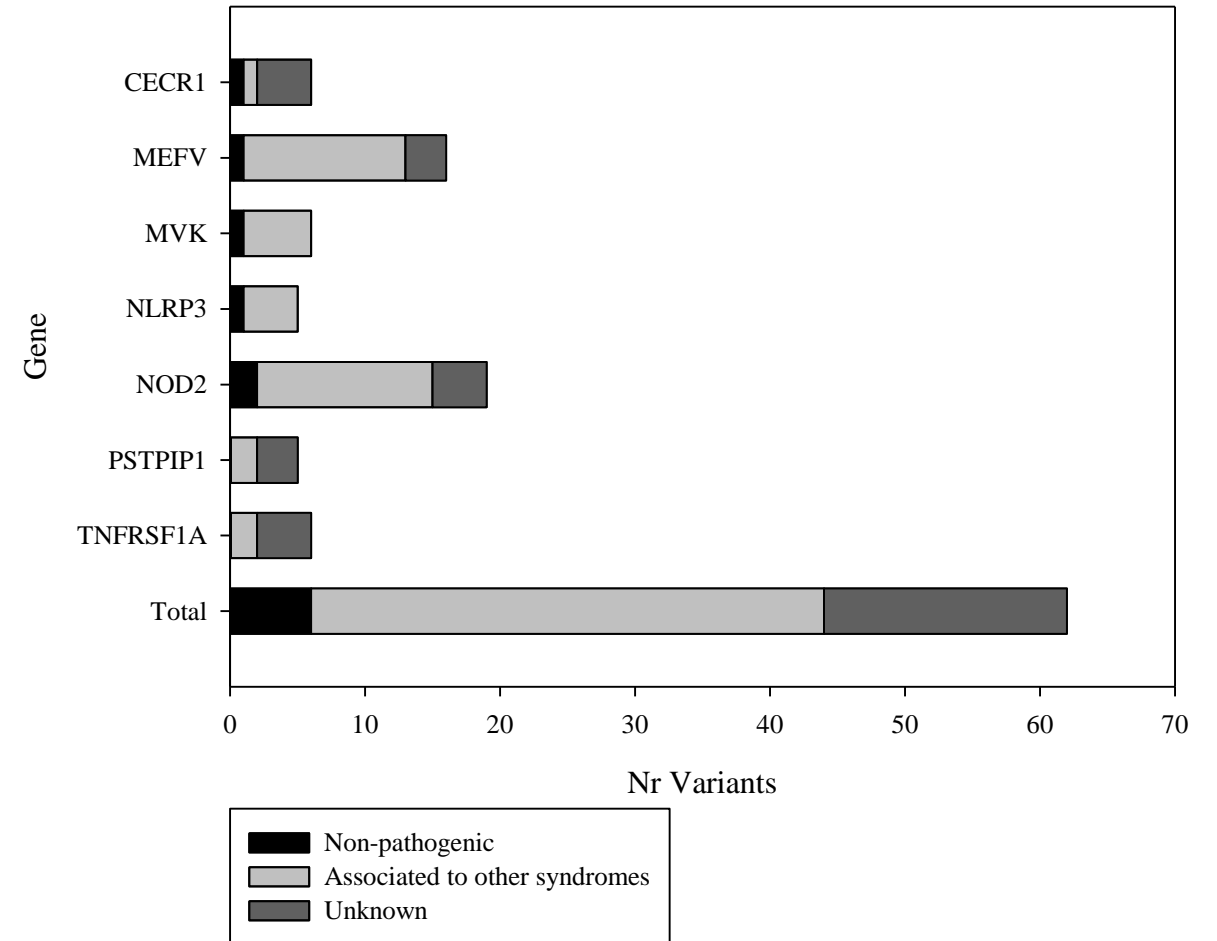

**Figure S2.** Graphical representation of the number of variants classified in subgroups according to (A) their 1000 genomes MAF and (B) the information available in clinical human mutation databases.
